# Supplementary material for: Comparative analyses of aging-related genes in long-lived mammals provide insights into natural longevity
Source: PubMed Central journal article supplement — Innovation (Camb). 2021 Apr 29;2(2):100108. doi: 10.1016/j.xinn.2021.100108 (PMC8454735; doi:10.1016/j.xinn.2021.100108), 2021-04-29
Supplement: mmc1.pdf [file mmc1.pdf]

**The Innovation, Volume 2**

**Supplemental Information**

**Comparative analyses of aging-related  
genes in long-lived mammals provide  
insights into natural longevity**

**Zhenpeng Yu, Inge Seim, Mengxin Yin, Ran Tian, Di Sun, Wenhua Ren, Guang  
Yang, and Shixia Xu**

## *Supplementary Information*

### **Comparative analyses of aging-related genes in long-lived mammals provide insights into natural longevity**

Zhenpeng Yu,<sup>1</sup> Inge Seim,<sup>1,2,3</sup> Mengxin Yin,<sup>1</sup> Ran Tian,<sup>1</sup> Di Sun,<sup>1</sup> Wenhua Ren,<sup>1</sup> Guang Yang,<sup>1,\*</sup> and Shixia Xu<sup>1,\*</sup>

<sup>1</sup> Jiangsu Key Laboratory for Biodiversity and Biotechnology, College of Life Sciences, Nanjing Normal University, Nanjing 210023, China

<sup>2</sup> Integrative Biology Laboratory, College of Life Sciences, Nanjing Normal University, Nanjing 210023, China

<sup>3</sup> School of Biology and Environmental Science, Faculty of Science and Engineering, Queensland University of Technology, Brisbane, QLD, Australia

\*Correspondence: [gyang@njnu.edu.cn](mailto:gyang@njnu.edu.cn) (G.Y.); [xushixia78@163.com](mailto:xushixia78@163.com)

(S.X.)

## MATERIALS AND METHODS

### Species Coverage and Definition of Long-lived Species

A total of 36 mammals representing 14 orders were examined: Cetartiodactyla (*B. mysticetus*, *Tursiops truncatus*, *Orcinus orca*, *Lipotes vexillifer*, *Balaenoptera acutorostrata*, *Physeter catodon*, *Neophocaena asiaorientalis*, *Vicugna pacos*, *Bos Taurus*, *Ovis aries*), Perissodactyla (*Equus caballus*), Carnivora (*Canis lupus familiaris*, *Felis catus*), Chiroptera (*M. brandtii*, *Myotis lucifugus*, *Pteropus vampyrus*), Eulipotyphla (*Sorex araneus*, *Erinaceus europaeus*), Primates (*H. sapiens*, *M. nemestrina*, *Carlito syrichta*, *P. abelii*, *C. jacchus*, *M. murinus*), Rodentia (*H. glaber*, *Rattus norvegicus*, *Mus musculus*, *Cavia porcellus*), Lagomorpha (*Oryctolagus cuniculus*, *Ochotona princeps*), Proboscidea (*L. Africana*), Hyracoidea (*Procavia capensis*), Afrosoricida (*Echinops telfairi*), Cingulata (*Dasypus novemcinctus*), Pilosa (*Choloepus hoffmanni*), and Didelphimorphia (*Monodelphis domestica*) (Table S1).

We used the scientific method of evaluating longevity quotient (LQ)—i.e., the ratio of the observed maximum lifespan (MLS) to the predicted maximum lifespan<sup>1-2</sup>—to determine whether species are long-lived for their body size. We first obtained the maximum lifespan and body mass (BM) records for all mammals (n = 987) from the AnAge online database.<sup>3</sup> Each species' longevity quotient was calculated to follow the allometric equation for mammals:<sup>2</sup>

$$LQ = \frac{MLS}{6.32 \times BM^{0.139}}$$

Then, we split the dataset into two groups based on longevity quotient: long-lived group contained the species with a longevity quotient greater than 1 SD (standard

deviation) from the mean of all mammals, and the control group contained all other species.

### **Sequence Retrieval and Alignments**

Aging-related gene list of human was first retrieved from the GenAge<sup>3</sup> database. The protein-coding sequence (CDS) for each human aging-related gene was then downloaded from the NCBI database. The CDS of other mammalian species was downloaded from NCBI, the OrthoMAM v10 database,<sup>4</sup> and the Bowhead Whale Genome Resource (<http://www.bowhead-whale.org/>).<sup>5</sup> Additionally, the low quality or unannotated CDS in the database was further verified using BLASTn searches. For each gene, the longest transcript was kept in our analysis. Thus, 115 one-to-one orthologous genes among 36 species were selected for subsequent analysis (Table S2). Next, we performed multiple sequence alignments for each orthologous gene using PRANK with default settings, which uses phylogenetic information to distinguish alignment gaps caused by insertions or deletions and produces good alignments for evolutionary inferences.<sup>6-7</sup> Finally, potentially unreliable regions of multiple alignments were removed using the Gblocks v0.91 program with default settings (“-t = c”).<sup>8</sup>

### **Molecular Evolution Analyses**

The measure of natural selection acting on the genes was determined by estimating the ratio of nonsynonymous ( $d_N$ ) / synonymous ( $d_S$ ) substitution rates ( $d_N/d_S$ ) implemented in the CodeML program of the PAML software package v4.9.<sup>9</sup> Briefly,

$d_N/d_S < 1$ ,  $d_N/d_S = 1$ , and  $d_N/d_S > 1$  indicate negative selection, neutral evolution, and positive selection, respectively. A well-accepted species tree of 36 species in our study from the TimeTree database (<http://www.timetree.org/>) was used as the input tree for all analyses.<sup>10</sup>

To investigate whether aging-related genes have undergone significant differences in selection pressures between long-lived species and the control group, the branch-site model was used to test the selection of each extant lineage in this study.<sup>11</sup> Each long-lived species was used as a foreground branch in every run, and all control group species were set as the background branch. Compared with the null hypothesis model of neutral evolution ( $d_N/d_S = 1$ ), foreground branches in the modified model A that have a class of sites with the ratio  $d_N/d_S > 1$  for positive selection. All positively selected sites in the branch-site model were identified using a Bayes Empirical Bayes (BEB) analysis with posterior probabilities  $\geq 0.80$ .<sup>12</sup> In addition, the clade model C and its null model M2a\_rel (nearly neutral) were used to detect evidence of divergent selective pressures acting across the combined branch of all extant long-lived lineage as the foreground compared with the remaining species in the tree as the background.<sup>13</sup> The clade model C assumes variation in  $d_N/d_S$  among sites, allowing a fraction of sites evolving under divergent selective pressures. The model assumes three classes of sites, representing evolutionarily conserved codons, neutral codons, and codons under divergent selection pressures between the foreground and background clades. We set each model with three initial  $d_N/d_S$  values (0.5, 1, and 1.5) to obtain the robust average  $d_N/d_S$ , and compared this result with that of model M2a\_ref. Only genes with an unchangeable likelihood

value for the three initial  $d_N/d_S$  values were considered. The likelihood ratio test (LRT) with  $\chi^2$  distribution was used to determine which models were statistically different from the null model. The  $P$ -values were adjusted for multiple testing using the false discovery rate (FDR) procedure and adjusted  $P$ -values  $< 0.05$  were considered significant for branch-site model analysis.<sup>14</sup>

### **Convergent Evolution Detection**

Here, we used two methods to detect the molecular basis of convergent evolution in long-lived species. First, ancestral amino acid sequences were reconstructed for 115 one-to-one orthologous genes among 36 species using the CodeML program in PAML 4.9.<sup>9</sup> Then, convergent amino acid substitutions in independent pairs of long-lived lineage were detected by Zhang and Kumar's method.<sup>15</sup> Considering noise resulting from the random amino acid substitutions of convergence, the JTT- $f_{\text{genes}}$  model of amino acid substitution were used to estimate the expected number of molecular convergences in each protein alignment.<sup>16</sup> A Poisson test was finally performed to verify whether the observed number of convergent sites in each gene was significantly more than the expected number caused by random substitution.

Second, we determined unique amino acid substitutions based on sequence alignments using FasParser2,<sup>17</sup> since convergent phenotypic characteristics can also arise from unique substitutions that independently evolved in different species.<sup>18</sup> If the same amino acid changes were identified in at least five long-lived species and none were found in the control group, then these amino acid changes were considered to be

long-lived group specific amino acid substitutions.

### **Association Analysis between Gene Evolution and Phenotypes**

Finally, we wished to assess the relationship between the rate of gene evolution and aging-associated life-history traits.<sup>19</sup> To test whether maximum lifespan covaries with body mass and longevity quotient, we first carried out a nonphylogenetic regression using the *lm* function in R 3.5.1. Moreover, we used Pagel's  $\lambda$  model to test for phylogenetic signals in mammalian life-history traits. Pagel's  $\lambda$  describes the proportion of variance that can be attributed to Brownian motion along a phylogeny. A value of  $\lambda$  equal or close to 1 suggests that the character is evolving stochastically, whereas  $\lambda < 1$  indicates a departure from neutral drift. Estimates of  $\lambda$  for all life-history traits were computed using the *phytools* package in R 3.5.1.<sup>20</sup>

To explore the potential relationships between the evolutionary rate ( $d_N / d_S$ ) of aging-related genes and life-history phenotypes, the root-to-tip  $d_N / d_S$  that considers the evolutionary history of a locus were calculated for each gene using the free-ratio model from PAML v4.9.<sup>9</sup> For this analysis, a  $d_S$  value of approximately 0 along a branch always yields a very high  $d_N / d_S$  value. Hence, genes with  $d_S < 0.0001$  were discarded in our analysis. Finally, phylogenetic generalized least squares regression was performed in the *caper* package in R 3.5.1<sup>21</sup> to evaluate the associations between Log<sub>10</sub>-transformed root-to-tip  $d_N / d_S$  and life-history traits (longevity quotient without log-transform).<sup>22</sup>

To assess the robustness of the results, we applied a two-step verification

procedure as previously described.<sup>23</sup> First, the regression was performed by excluding the species with the largest residue error (e.g., a potential outlier) to report the regression slope *P*-value (“*P* value.robust”). Second, the regression was repeated by excluding each species, one at a time, to report the maximum (i.e., least significant) *P*-value (“*P* value.max”), and ensure that the overall relationship did not depend on any single species. Both *P* value.robust < 0.01 and *P* value.max < 0.1 were chosen as the cut-offs.

### **Pathway Enrichment and Protein-protein Interaction Analysis**

We performed a pathway enrichment analysis to explore the biological mechanisms underlying the associations between the candidate genes and longevity pathways. The functional enrichment analyses in Gene Ontology (GO) terms for Biological Process (BP), the Kyoto Encyclopedia of Genes and Genomes (KEGG), Disease Ontology (DO), and Reactome pathway were performed in the R package *clusterProfiler*.<sup>24</sup> DO provides a consistent description of genes in disease perspectives and Reactome is a manually curated resource that describes chemical reactions and biological processes and pathways. For each pathway, the hypergeometric test was used to detect any overrepresentation of our set of genes among all genes in the pathway. FDR was controlled using the Benjamini–Hochberg procedure in R 3.5.1.<sup>25</sup> A protein-protein interaction network analysis was performed using STRING v11.<sup>26</sup>



## Supplementary Figure

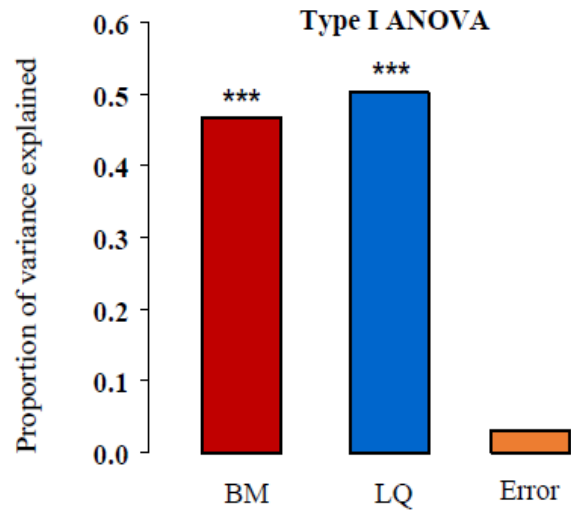

**Figure S1.** Bar plot showing the variance in maximum lifespan (MLS) explained by each life-history trait (body mass (BM) or longevity quotient (LQ)) as studied in a multivariate model, \*\*\*P value < 0.001.

## Supplementary Tables

Table S1 Datasets of 36 mammals in the present study.

| Order           | Species                            | MLS/year | BM/g        | LQ   |
|-----------------|------------------------------------|----------|-------------|------|
|                 | <i>Balaena mysticetus</i>          | 211      | 100,000,000 | 2.58 |
|                 | <i>Tursiops truncatus</i>          | 51.6     | 200,000     | 1.50 |
|                 | <i>Orcinus orca</i>                | 90       | 3,987,500   | 1.72 |
|                 | <i>Lipotes vexillifer</i>          | 24       | 83,500      | 0.79 |
|                 | <i>Balaenoptera acutorostrata</i>  | 50       | 7,500,000   | 0.88 |
| Cetartiodactyla | <i>Physeter catodon</i>            | 77       | 28,500,000  | 1.12 |
|                 | <i>Neophocaena asiaeorientalis</i> | 33       | 32,500      | 1.23 |
|                 | <i>Vicugna pacos</i>               | 25.8     | 62,000      | 0.88 |
|                 | <i>Bos taurus</i>                  | 20       | 750,000     | 0.48 |
|                 | <i>Ovis aries</i>                  | 22.8     | 80,000      | 0.75 |
| Perissodactyla  | <i>Equus caballus</i>              | 57       | 300,000     | 1.56 |
| Carnivora       | <i>Canis lupus familiaris</i>      | 24       | 40,000      | 0.87 |
|                 | <i>Felis catus</i>                 | 30       | 3,900       | 1.50 |
|                 | <i>Myotis brandtii</i>             | 41       | 7           | 4.95 |
| Chiroptera      | <i>Myotis lucifugus</i>            | 34       | 10          | 3.91 |
|                 | <i>Pteropus vampyrus</i>           | 20.9     | 872         | 1.29 |
|                 | <i>Sorex araneus</i>               | 3.2      | 9           | 0.37 |
| Eulipotyphla    | <i>Erinaceus europaeus</i>         | 11.7     | 750         | 0.74 |
|                 | <i>Homo sapiens</i>                | 122.5    | 62,035      | 4.18 |
|                 | <i>Macaca nemestrina</i>           | 37.6     | 7,913       | 1.71 |
| Primates        | <i>Carlito syrichta</i>            | 16       | 119.2       | 1.30 |
|                 | <i>Pongo abelii</i>                | 59       | 64,475      | 2.00 |
|                 | <i>Callithrix jacchus</i>          | 22.8     | 255.2       | 1.67 |
|                 | <i>Microcebus murinus</i>          | 18.2     | 64.8        | 1.61 |
|                 | <i>Heterocephalus glaber</i>       | 31       | 35          | 2.99 |
| Rodentia        | <i>Rattus norvegicus</i>           | 3.8      | 300         | 0.27 |
|                 | <i>Mus musculus</i>                | 4        | 20.5        | 0.42 |
|                 | <i>Cavia porcellus</i>             | 12       | 728         | 0.76 |
| Lagomorpha      | <i>Oryctolagus cuniculus</i>       | 9        | 1,800       | 0.50 |
|                 | <i>Ochotona princeps</i>           | 7        | 100         | 0.58 |
|                 | <i>Loxodonta africana</i>          | 65       | 4,800,000   | 1.21 |
| Afrotheria      | <i>Procavia capensis</i>           | 14.8     | 3,600       | 0.75 |
|                 | <i>Echinops telfairi</i>           | 19       | 180         | 1.46 |
| Cingulata       | <i>Dasypus novemcinctus</i>        | 22.3     | 5,500       | 1.07 |
| Pilosa          | <i>Choloepus hoffmanni</i>         | 41       | 6,250       | 1.93 |
| Didelphimorphia | <i>Monodelphis domestica</i>       | 5.1      | 105         | 0.42 |

Table S2 List of 115 aging-related genes used in in the present study.

| <b>Gene</b>  | <b>Entrez ID</b> | <b>Gene Name</b>                                    | <b>Gene Function/GeneCards</b> |
|--------------|------------------|-----------------------------------------------------|--------------------------------|
| <i>ABL1</i>  | 25               | ABL proto-oncogene 1, non-receptor tyrosine kinase  | Cancer                         |
| <i>AGTR1</i> | 185              | angiotensin II receptor, type 1                     | Metabolism                     |
| <i>APOE</i>  | 348              | apolipoprotein E                                    | Metabolism                     |
| <i>APP</i>   | 351              | amyloid beta precursor protein                      | Transcription regulation       |
| <i>APTX</i>  | 54840            | aprataxin                                           | DNA damage repair              |
| <i>ARNTL</i> | 406              | aryl hydrocarbon receptor nuclear translocator-like | Transcription regulation       |
| <i>ATF2</i>  | 1386             | activating transcription factor 2                   | Transcription regulation       |
| <i>ATM</i>   | 472              | ATM serine/threonine kinase                         | Cancer                         |
| <i>ATP5O</i> | 539              | ATP synthase peripheral stalk subunit OSCP          | Metabolism                     |
| <i>ATR</i>   | 545              | ATR serine/threonine kinase                         | Cancer                         |
| <i>BAX</i>   | 581              | BCL2-associated X protein                           | Apoptosis                      |
| <i>BCL2</i>  | 596              | B-cell CLL/lymphoma 2                               | Apoptosis                      |
| <i>BLM</i>   | 641              | Bloom syndrome, RecQ helicase-like                  | DNA damage repair              |
| <i>BMI1</i>  | 648              | BMI1 proto-oncogene, polycomb ring finger           | DNA damage repair              |
| <i>BRCA1</i> | 672              | breast cancer 1, early onset                        | Cancer                         |
| <i>BSCL2</i> | 26580            | Berardinelli-Seip congenital lipodystrophy 2        | Immune system                  |
| <i>BUB3</i>  | 9184             | BUB3 mitotic checkpoint protein                     | Cell cycle                     |
| <i>CIQA</i>  | 712              | complement component 1, q subcomponent, A chain     | Cell cycle                     |
| <i>CCNA2</i> | 890              | cyclin A2                                           | Cell cycle                     |
| <i>CDC42</i> | 998              | cell division cycle 42                              | Cell cycle                     |
| <i>CDK1</i>  | 983              | cyclin-dependent kinase 1                           | Cell cycle                     |

---

|               |        |                                                            |                          |
|---------------|--------|------------------------------------------------------------|--------------------------|
| <i>CDK7</i>   | 1022   | cyclin-dependent kinase 7                                  | Cell cycle               |
| <i>CDKN1A</i> | 1026   | cyclin-dependent kinase inhibitor 1A                       | Cell cycle               |
| <i>CDKN2B</i> | 1030   | cyclin-dependent kinase inhibitor 2B                       | Cell cycle               |
| <i>CHEK2</i>  | 11200  | checkpoint kinase 2                                        | Cell cycle               |
| <i>CISD2</i>  | 493856 | CDGSH iron sulfur domain 2                                 | Apoptosis                |
| <i>CLOCK</i>  | 9575   | clock circadian regulator                                  | Transcription regulation |
| <i>CNR1</i>   | 1268   | cannabinoid receptor 1 (brain)                             | Cell Surface Receptors   |
| <i>COQ7</i>   | 10229  | coenzyme Q7 homolog, ubiquinone (yeast)                    | Metabolism               |
| <i>CREB1</i>  | 1385   | cAMP responsive element binding protein 1                  | Transcription regulation |
| <i>CREBBP</i> | 1387   | CREB binding protein                                       | Transcription regulation |
| <i>CSNK1E</i> | 1454   | casein kinase 1, epsilon                                   | DNA damage repair        |
| <i>CTGF</i>   | 1490   | connective tissue growth factor                            | Growth regulation        |
| <i>CTNNB1</i> | 1499   | catenin (cadherin-associated protein), beta 1              | Signal transduction      |
| <i>DBN1</i>   | 1627   | drebrin 1                                                  | Signal transduction      |
| <i>DGAT1</i>  | 8694   | diacylglycerol O-acyltransferase 1                         | Metabolism               |
| <i>E2F1</i>   | 1869   | E2F transcription factor 1                                 | Apoptosis                |
| <i>EFEMP1</i> | 2202   | EGF containing fibulin-like extracellular matrix protein 1 | Growth regulation        |
| <i>EGFR</i>   | 1956   | epidermal growth factor receptor                           | Cancer                   |
| <i>EGR1</i>   | 1958   | early growth response 1                                    | Growth regulation        |
| <i>EIF5A2</i> | 56648  | eukaryotic translation initiation factor 5A2               | Transcription regulation |
| <i>EMD</i>    | 2010   | emerin                                                     | Growth regulation        |
| <i>EPOR</i>   | 2057   | Erythropoietin receptor                                    | Growth regulation        |
| <i>EPS8</i>   | 2059   | epidermal growth factor receptor pathway substrate 8       | Growth regulation        |
| <i>ERBB2</i>  | 2064   | erb-b2 receptor tyrosine kinase 2                          | Cancer                   |

---

---

|               |      |                                                 |                          |
|---------------|------|-------------------------------------------------|--------------------------|
| <i>ERCC1</i>  | 2067 | excision repair cross-complementation group 1   | DNA damage repair        |
| <i>ERCC2</i>  | 2068 | excision repair cross-complementation group 2   | DNA damage repair        |
| <i>ERCC3</i>  | 2071 | excision repair cross-complementation group 3   | DNA damage repair        |
| <i>ERCC5</i>  | 2073 | excision repair cross-complementation group 5   | DNA damage repair        |
| <i>ERCC6</i>  | 2074 | excision repair cross-complementation group 6   | DNA damage repair        |
| <i>ERCC8</i>  | 1161 | excision repair cross-complementation group 8   | DNA damage repair        |
| <i>ESR1</i>   | 2099 | estrogen receptor 1                             | Growth regulation        |
| <i>FGF23</i>  | 8074 | fibroblast growth factor 23                     | Growth regulation        |
| <i>FGFR1</i>  | 2260 | fibroblast growth factor receptor 1             | Growth regulation        |
| <i>FOS</i>    | 2353 | FBJ murine osteosarcoma viral oncogene homolog  | Transcription regulation |
| <i>FOXM1</i>  | 2305 | forkhead box M1                                 | Cell cycle               |
| <i>FOXO1</i>  | 2308 | forkhead box O1                                 | Transcription regulation |
| <i>FOXO3</i>  | 2309 | forkhead box O3                                 | Transcription regulation |
| <i>FOXO4</i>  | 4303 | forkhead box O4                                 | Transcription regulation |
| <i>GCLC</i>   | 2729 | glutamate-cysteine ligase, catalytic subunit    | Growth regulation        |
| <i>GCLM</i>   | 2730 | glutamate-cysteine ligase, modifier subunit     | Growth regulation        |
| <i>GHR</i>    | 2690 | growth hormone receptor                         | Growth regulation        |
| <i>GHRH</i>   | 2691 | growth hormone releasing hormone                | Growth regulation        |
| <i>GRB2</i>   | 2885 | growth factor receptor-bound protein 2          | Signal transduction      |
| <i>GRN</i>    | 2896 | granulin                                        | Growth regulation        |
| <i>GSK3B</i>  | 2932 | glycogen synthase kinase 3 beta                 | Metabolism               |
| <i>GSS</i>    | 2937 | glutathione synthetase                          | Metabolism               |
| <i>GSTA4</i>  | 2941 | glutathione S-transferase alpha 4               | Metabolism               |
| <i>GTF2H2</i> | 2966 | general transcription factor IIH, polypeptide 2 | DNA damage repair        |

---

---

|               |       |                                                           |                          |
|---------------|-------|-----------------------------------------------------------|--------------------------|
| <i>H2AFX</i>  | 3014  | H2A histone family, member X                              | DNA damage repair        |
| <i>HBP1</i>   | 26959 | HMG-box transcription factor 1                            | Transcription regulation |
| <i>HDAC3</i>  | 8841  | histone deacetylase 3                                     | Transcription regulation |
| <i>HELLS</i>  | 3070  | helicase, lymphoid-specific                               | DNA damage repair        |
| <i>HESX1</i>  | 8820  | HESX homeobox 1                                           | Transcription regulation |
| <i>HIF1A</i>  | 3091  | hypoxia inducible factor 1, alpha subunit                 | Metabolism               |
| <i>HMGB1</i>  | 3146  | high mobility group box 1                                 | DNA damage repair        |
| <i>HMGB2</i>  | 3148  | high mobility group box 2                                 | DNA damage repair        |
| <i>HRAS</i>   | 3265  | Harvey rat sarcoma viral oncogene homolog                 | Cancer                   |
| <i>IGF1</i>   | 3479  | insulin-like growth facto 1                               | Growth regulation        |
| <i>IGF1R</i>  | 3480  | insulin-like growth factor 1 receptor                     | Growth regulation        |
| <i>IL2</i>    | 3558  | interleukin 2                                             | Immune system            |
| <i>IL2RG</i>  | 3561  | interleukin 2 receptor, gamma                             | Immune system            |
| <i>IL7R</i>   | 3575  | interleukin 7 receptor                                    | Immune system            |
| <i>INSR</i>   | 3643  | insulin receptor                                          | Growth regulation        |
| <i>IRS1</i>   | 3667  | insulin receptor substrate 1                              | Signal transduction      |
| <i>LMNA</i>   | 4000  | lamin A/C                                                 | Growth regulation        |
| <i>NCOR1</i>  | 9611  | nuclear receptor corepressor 1                            | Transcription regulation |
| <i>NGF</i>    | 4803  | nerve growth factor                                       | Signal transduction      |
| <i>NGFR</i>   | 4804  | nerve growth factor receptor                              | Signal transduction      |
| <i>NRG1</i>   | 3084  | neuregulin 1                                              | Growth regulation        |
| <i>PDGFB</i>  | 5155  | platelet-derived growth factor beta polypeptide           | Growth regulation        |
| <i>PDGFRB</i> | 5159  | platelet-derived growth factor receptor, beta polypeptide | Growth regulation        |
| <i>PEX5</i>   | 5830  | peroxisomal biogenesis factor 5                           | Metabolism               |

---

|               |      |                                                                        |                          |
|---------------|------|------------------------------------------------------------------------|--------------------------|
| <i>PIK3CB</i> | 5291 | phosphatidylinositol-4,5-bisphosphate 3-kinase, catalytic subunit beta | Signal transduction      |
| <i>PINI</i>   | 5300 | peptidylprolyl cis/trans isomerase, NIMA-interacting 1                 | Cell cycle               |
| <i>PLAU</i>   | 5328 | plasminogen activator, urokinase                                       | Signal transduction      |
| <i>PLCG2</i>  | 5336 | phospholipase C, gamma 2                                               | Signal transduction      |
| <i>POU1F1</i> | 5449 | POU class 1 homeobox 1                                                 | Transcription regulation |
| <i>PPARA</i>  | 5465 | peroxisome proliferator-activated receptor alpha                       | Metabolism               |
| <i>PRKCD</i>  | 5580 | protein kinase C, delta                                                | Apoptosis                |
| <i>PTEN</i>   | 5728 | phosphatase and tensin homolog                                         | Cell cycle               |
| <i>PTPN1</i>  | 5770 | protein tyrosine phosphatase, non-receptor type 1                      | Signal transduction      |
| <i>PTPN11</i> | 5781 | protein tyrosine phosphatase, non-receptor type 11                     | Signal transduction      |
| <i>RET</i>    | 5979 | ret proto-oncogene                                                     | Cell cycle               |
| <i>RPA1</i>   | 6117 | replication protein A1                                                 | DNA damage repair        |
| <i>SHC1</i>   | 6464 | SHC transforming protein 1                                             | Growth regulation        |
| <i>SST</i>    | 6750 | somatostatin                                                           | Growth regulation        |
| <i>STAT3</i>  | 6774 | signal transducer and activator of transcription 3                     | Transcription regulation |
| <i>STAT5A</i> | 6776 | signal transducer and activator of transcription 5A                    | Transcription regulation |
| <i>STAT5B</i> | 6777 | signal transducer and activator of transcription 5B                    | Transcription regulation |
| <i>TCF3</i>   | 6929 | transcription factor 3                                                 | Transcription regulation |
| <i>TP53</i>   | 7157 | tumor protein p53                                                      | Cancer                   |
| <i>TXN</i>    | 7295 | thioredoxin                                                            | Cancer                   |
| <i>VCP</i>    | 7415 | valosin containing protein                                             | DNA damage repair        |
| <i>WRN</i>    | 7486 | Werner syndrome, RecQ helicase-like                                    | DNA damage repair        |

Table S3 List of positively selected genes identified in long-lived species.

| Branch                       | Gene         | Model       | LnL       | 2ΔlnL  | p.adjust                                             | Parameters                                           | Positive Sites (pp > 0.8)                                  |
|------------------------------|--------------|-------------|-----------|--------|------------------------------------------------------|------------------------------------------------------|------------------------------------------------------------|
| <i>Heterocephalus glaber</i> | <i>IL7R</i>  | ModelA      | -5355.063 |        |                                                      | $\omega_0 = 0.136 \omega_1 = 1.0 \omega_2 = 55.56$   | 184 0.990**;                                               |
|                              |              | ModelA Null | -5358.884 | 7.642  | 0.006                                                | $\omega_0 = 0.136 \omega_1 = 1.0 \omega_2 = 1.0$     |                                                            |
|                              | <i>DGATI</i> | ModelA      | -7826.170 |        |                                                      | $\omega_0 = 0.037 \omega_1 = 1.0 \omega_2 = 206.344$ | 271 0.995**;                                               |
|                              |              | ModelA Null | -7831.196 | 10.051 | 0.002                                                | $\omega_0 = 0.038 \omega_1 = 1.0 \omega_2 = 1.0$     |                                                            |
|                              | <i>NGF</i>   | ModelA      | -4700.352 |        |                                                      | $\omega_0 = 0.057 \omega_1 = 1.0 \omega_2 = 19.701$  | 120 0.986*;                                                |
|                              |              | ModelA Null | -4702.660 | 4.615  | 0.032                                                | $\omega_0 = 0.057 \omega_1 = 1.0 \omega_2 = 1.0$     |                                                            |
|                              | <i>SHCI</i>  | ModelA      | -8468.794 |        |                                                      | $\omega_0 = 0.021 \omega_1 = 1.0 \omega_2 = 23.46$   | 51 0.972*;                                                 |
|                              |              | ModelA Null | -8471.238 | 4.888  | 0.027                                                | $\omega_0 = 0.021 \omega_1 = 1.0 \omega_2 = 1.0$     |                                                            |
| <i>STAT5A</i>                | ModelA       | -11545.632  |           |        | $\omega_0 = 0.022 \omega_1 = 1.0 \omega_2 = 435.158$ | 519 0.901; 603 0.985*;                               |                                                            |
|                              | ModelA Null  | -11548.466  | 5.669     | 0.017  | $\omega_0 = 0.022 \omega_1 = 1.0 \omega_2 = 1.0$     |                                                      |                                                            |
| <i>Balaena mysticetus</i>    | <i>GSK3B</i> | ModelA      | -4458.212 |        |                                                      | $\omega_0 = 0.01 \omega_1 = 1.0 \omega_2 = 999.0$    | 57 0.840; 118 0.841;                                       |
|                              |              | ModelA Null | -4460.432 | 4.440  | 0.035                                                | $\omega_0 = 0.01 \omega_1 = 1.0 \omega_2 = 1.0$      |                                                            |
| <i>Homo sapiens</i>          | <i>EMD</i>   | ModelA      | -1585.090 |        |                                                      | $\omega_0 = 0.066 \omega_1 = 1.0 \omega_2 = 325.92$  | 6 0.996**;                                                 |
|                              |              | ModelA Null | -1588.927 | 7.674  | 0.006                                                | $\omega_0 = 0.065 \omega_1 = 1.0 \omega_2 = 1.0$     |                                                            |
| <i>Pongo abelii</i>          | <i>PPARA</i> | ModelA      | -9645.415 |        |                                                      | $\omega_0 = 0.023 \omega_1 = 1.0 \omega_2 = 8.497$   | 220 0.978*; 222 0.992**; 223 0.838; 291 0.989*;            |
|                              |              | ModelA Null | -9649.334 | 7.838  | 0.005                                                | $\omega_0 = 0.023 \omega_1 = 1.0 \omega_2 = 1.0$     |                                                            |
|                              | <i>EGR1</i>  | ModelA      | -8655.636 |        |                                                      | $\omega_0 = 0.032 \omega_1 = 1.0 \omega_2 = 10.739$  | 83 0.994**; 95 0.996**; 313 0.967*; 415 0.562; 417 0.987*; |
|                              |              | ModelA Null | -8660.138 | 9.005  | 0.003                                                | $\omega_0 = 0.031 \omega_1 = 1.0 \omega_2 = 1.0$     |                                                            |
|                              | <i>GSS</i>   | ModelA      | -7345.481 |        |                                                      | $\omega_0 = 0.064 \omega_1 = 1.0 \omega_2 = 999.0$   |                                                            |
|                              | ModelA Null  | -7347.529   | 4.097     | 0.043  | $\omega_0 = 0.063 \omega_1 = 1.0 \omega_2 = 1.0$     |                                                      |                                                            |



|                            |               |             |            |        |       |                                                      |                                                                               |
|----------------------------|---------------|-------------|------------|--------|-------|------------------------------------------------------|-------------------------------------------------------------------------------|
|                            | <i>GHR</i>    | ModelA      | -9180.019  |        |       | $\omega_0 = 0.092 \omega_1 = 1.0 \omega_2 = 11.079$  | 59 0.867; 118 0.823; 124 0.830;<br>156 R 0.927; 160 0.826; 205<br>1.000**;    |
|                            |               | ModelA Null | -9184.384  | 8.729  | 0.003 | $\omega_0 = 0.092 \omega_1 = 1.0 \omega_2 = 1.0$     |                                                                               |
|                            | <i>STAT5B</i> | ModelA      | -11534.536 |        |       | $\omega_0 = 0.015 \omega_1 = 1.0 \omega_2 = 12.221$  | 625 0.962*; 627 0.988*;                                                       |
|                            |               | ModelA Null | -11538.173 | 7.274  | 0.007 | $\omega_0 = 0.015 \omega_1 = 1.0 \omega_2 = 1.0$     |                                                                               |
| <i>Microcebus murinus</i>  | <i>HELLS</i>  | ModelA      | -12118.730 |        |       | $\omega_0 = 0.046 \omega_1 = 1.0 \omega_2 = 73.435$  | 267 0.956*; 271 0.916;                                                        |
|                            |               | ModelA Null | -12123.525 | 9.590  | 0.002 | $\omega_0 = 0.045 \omega_1 = 1.0 \omega_2 = 1.0$     |                                                                               |
|                            | <i>ATF2</i>   | ModelA      | -6527.743  |        |       | $\omega_0 = 0.025 \omega_1 = 1.0 \omega_2 = 44.668$  | 295 0.839;                                                                    |
|                            |               | ModelA Null | -6530.159  | 4.832  | 0.028 | $\omega_0 = 0.025 \omega_1 = 1.0 \omega_2 = 1.0$     |                                                                               |
|                            | <i>PLAU</i>   | ModelA      | -8085.969  |        |       | $\omega_0 = 0.055 \omega_1 = 1.0 \omega_2 = 10.305$  | 12 0.987*; 30 0.992**;                                                        |
|                            |               | ModelA Null | -8087.895  | 3.852  | 0.050 | $\omega_0 = 0.054 \omega_1 = 1.0 \omega_2 = 1.0$     |                                                                               |
|                            | <i>NCOR1</i>  | ModelA      | -33035.937 |        |       | $\omega_0 = 0.044 \omega_1 = 1.0 \omega_2 = 909.062$ | 1377 0.991**; 1533 0.995**; 1536<br>M 0.992**; 1547 0.993**; 1548<br>0.992**; |
| <i>Callithrix jacchus</i>  |               | ModelA Null | -33055.111 | 38.347 | 0.000 | $\omega_0 = 0.043 \omega_1 = 1.0 \omega_2 = 1.0$     |                                                                               |
|                            | <i>ATM</i>    | ModelA      | -47199.353 |        |       | $\omega_0 = 0.091 \omega_1 = 1.0 \omega_2 = 28.599$  | 164 0.962*;                                                                   |
|                            |               | ModelA Null | -47203.736 | 8.766  | 0.003 | $\omega_0 = 0.091 \omega_1 = 1.0 \omega_2 = 1.0$     |                                                                               |
|                            | <i>ERCC6</i>  | ModelA      | -18105.947 |        |       | $\omega_0 = 0.046 \omega_1 = 1.0 \omega_2 = 9.473$   | 220 0.982*; 787 0.951*;                                                       |
|                            |               | ModelA Null | -18107.924 | 3.953  | 0.047 | $\omega_0 = 0.046 \omega_1 = 1.0 \omega_2 = 1.0$     |                                                                               |
|                            | <i>CREBBP</i> | ModelA      | -32203.266 |        |       | $\omega_0 = 0.029 \omega_1 = 1.0 \omega_2 = 999.0$   | 1220 0.992*; 1221 0.972*; 1222<br>0.953*;                                     |
|                            |               | ModelA Null | -32213.183 | 19.834 | 0.000 | $\omega_0 = 0.029 \omega_1 = 1.0 \omega_2 = 1.0$     |                                                                               |
| <i>Macaca nemestrina</i>   | <i>ERBB2</i>  | ModelA      | -22231.960 |        |       | $\omega_0 = 0.04 \omega_1 = 1.0 \omega_2 = 147.608$  | 536 0.984*; 538 0.983*;                                                       |
|                            |               | ModelA Null | -22242.961 | 22.002 | 0.000 | $\omega_0 = 0.04 \omega_1 = 1.0 \omega_2 = 1.0$      |                                                                               |
| <i>Choloepus hoffmanni</i> | <i>VCP</i>    | ModelA      | -11067.049 |        |       | $\omega_0 = 0.001 \omega_1 = 1.0 \omega_2 = 8.211$   | 630 0.975*;                                                                   |

|                         |                      |            |        |       |                                                      |                                                                                                                                         |
|-------------------------|----------------------|------------|--------|-------|------------------------------------------------------|-----------------------------------------------------------------------------------------------------------------------------------------|
|                         | ModelA Null          | -11069.586 | 5.074  | 0.024 | $\omega_0 = 0.001 \omega_1 = 1.0 \omega_2 = 1.0$     |                                                                                                                                         |
|                         | <i>PDGFRB</i> ModelA | -19634.792 |        |       | $\omega_0 = 0.041 \omega_1 = 1.0 \omega_2 = 3.404$   | 157 0.993**; 200 0.993**; 202 0.995**; 203 0.992**; 223 0.996**; 227 0.889; 230 0.977*; 235 0.991**; 320 0.985*; 348 0.838; 411 0.962*; |
|                         | ModelA Null          | -19638.735 | 7.886  | 0.005 | $\omega_0 = 0.041 \omega_1 = 1.0 \omega_2 = 1.0$     |                                                                                                                                         |
|                         | <i>FOXO4</i> ModelA  | -6679.140  |        |       | $\omega_0 = 0.073 \omega_1 = 1.0 \omega_2 = 37.485$  | 37 0.848; 164 0.849; 169 0.835; 227 0.811; 330 0.826;                                                                                   |
|                         | ModelA Null          | -6681.398  | 4.517  | 0.034 | $\omega_0 = 0.072 \omega_1 = 1.0 \omega_2 = 1.0$     |                                                                                                                                         |
|                         | <i>IGF1</i> ModelA   | -1755.382  |        |       | $\omega_0 = 0.032 \omega_1 = 1.0 \omega_2 = 25.79$   | 81 0.995**;                                                                                                                             |
|                         | ModelA Null          | -1757.452  | 4.140  | 0.042 | $\omega_0 = 0.031 \omega_1 = 1.0 \omega_2 = 1.0$     |                                                                                                                                         |
|                         | <i>PTPN1</i> ModelA  | -4097.124  |        |       | $\omega_0 = 0.022 \omega_1 = 1.0 \omega_2 = 11.213$  | 148 0.999**; 150 0.989*;                                                                                                                |
|                         | ModelA Null          | -4100.872  | 7.496  | 0.006 | $\omega_0 = 0.022 \omega_1 = 1.0 \omega_2 = 1.0$     |                                                                                                                                         |
|                         | <i>APOE</i> ModelA   | -4064.174  |        |       | $\omega_0 = 0.097 \omega_1 = 1.0 \omega_2 = 11.505$  | 22 0.934; 100 0.974*; 145 0.969*;                                                                                                       |
|                         | ModelA Null          | -4067.841  | 7.335  | 0.007 | $\omega_0 = 0.097 \omega_1 = 1.0 \omega_2 = 1.0$     |                                                                                                                                         |
| <i>Myotis lucifugus</i> | <i>CTGF</i> ModelA   | -4684.116  |        |       | $\omega_0 = 0.028 \omega_1 = 1.0 \omega_2 = 52.795$  | 253 0.987*;                                                                                                                             |
|                         | ModelA Null          | -4686.771  | 5.310  | 0.021 | $\omega_0 = 0.028 \omega_1 = 1.0 \omega_2 = 1.0$     |                                                                                                                                         |
|                         | <i>BCL2</i> ModelA   | -2485.926  |        |       | $\omega_0 = 0.03 \omega_1 = 1.0 \omega_2 = 999.0$    | 60 0.990*;                                                                                                                              |
|                         | ModelA Null          | -2489.412  | 6.971  | 0.008 | $\omega_0 = 0.028 \omega_1 = 1.0 \omega_2 = 1.0$     |                                                                                                                                         |
|                         | <i>GHRH</i> ModelA   | -1064.223  |        |       | $\omega_0 = 0.112 \omega_1 = 1.0 \omega_2 = 25.548$  | 30 0.960*; 37 0.865;                                                                                                                    |
|                         | ModelA Null          | -1066.620  | 4.793  | 0.029 | $\omega_0 = 0.111 \omega_1 = 1.0 \omega_2 = 1.0$     |                                                                                                                                         |
|                         | <i>PDGFRB</i> ModelA | -19994.262 |        |       | $\omega_0 = 0.041 \omega_1 = 1.0 \omega_2 = 890.292$ | 534 0.976*; 536 0.830; 537 0.984*;                                                                                                      |
|                         | ModelA Null          | -20003.164 | 17.804 | 0.000 | $\omega_0 = 0.042 \omega_1 = 1.0 \omega_2 = 1.0$     |                                                                                                                                         |
|                         | <i>PLCG2</i> ModelA  | -20036.080 |        |       | $\omega_0 = 0.024 \omega_1 = 1.0 \omega_2 = 398.617$ | 665 0.962*;                                                                                                                             |
|                         | ModelA Null          | -20040.208 | 8.256  | 0.004 | $\omega_0 = 0.024 \omega_1 = 1.0 \omega_2 = 1.0$     |                                                                                                                                         |

|                        |              |             |            |       |                                                   |                                                      |                                                   |
|------------------------|--------------|-------------|------------|-------|---------------------------------------------------|------------------------------------------------------|---------------------------------------------------|
| <i>Myotis brandtii</i> | <i>DBN1</i>  | ModelA      | -6652.028  |       |                                                   | $\omega_0 = 0.023 \omega_1 = 1.0 \omega_2 = 998.998$ | 244 0.991**;                                      |
|                        |              | ModelA Null | -6655.057  | 6.058 | 0.014                                             | $\omega_0 = 0.022 \omega_1 = 1.0 \omega_2 = 1.0$     |                                                   |
|                        | <i>ERCC3</i> | ModelA      | -12103.038 |       |                                                   | $\omega_0 = 0.011 \omega_1 = 1.0 \omega_2 = 6.5$     | 623 0.978*; 626 0.959*;                           |
|                        |              | ModelA Null | -12105.404 | 4.731 | 0.030                                             | $\omega_0 = 0.011 \omega_1 = 1.0 \omega_2 = 1.0$     |                                                   |
|                        | <i>ABL1</i>  | ModelA      | -15096.886 |       |                                                   | $\omega_0 = 0.02 \omega_1 = 1.0 \omega_2 = 769.282$  | 518 0.951*;                                       |
|                        |              | ModelA Null | -15099.527 | 5.283 | 0.022                                             | $\omega_0 = 0.02 \omega_1 = 1.0 \omega_2 = 1.0$      |                                                   |
|                        | <i>CTGF</i>  | ModelA      | -4627.497  |       |                                                   | $\omega_0 = 0.029 \omega_1 = 1.0 \omega_2 = 23.054$  | 248 0.986*;                                       |
|                        |              | ModelA Null | -4629.796  | 4.598 | 0.032                                             | $\omega_0 = 0.029 \omega_1 = 1.0 \omega_2 = 1.0$     |                                                   |
|                        | <i>EGFR</i>  | ModelA      | -20310.597 |       |                                                   | $\omega_0 = 0.039 \omega_1 = 1.0 \omega_2 = 8.506$   | 145 0.824; 274 0.973*; 309 0.956*;<br>371 0.971*; |
|                        |              | ModelA Null | -20313.278 | 5.363 | 0.021                                             | $\omega_0 = 0.038 \omega_1 = 1.0 \omega_2 = 1.0$     |                                                   |
|                        | <i>DBN1</i>  | ModelA      | -6674.313  |       |                                                   | $\omega_0 = 0.02 \omega_1 = 1.0 \omega_2 = 998.999$  | 247 0.991**; 251 0.569;                           |
|                        |              | ModelA Null | -6676.998  | 5.370 | 0.020                                             | $\omega_0 = 0.02 \omega_1 = 1.0 \omega_2 = 1.0$      |                                                   |
| <i>ABL1</i>            | ModelA       | -15365.754  |            |       | $\omega_0 = 0.02 \omega_1 = 1.0 \omega_2 = 999.0$ | 514 0.952*;                                          |                                                   |
|                        | ModelA Null  | -15368.346  | 5.184      | 0.023 | $\omega_0 = 0.02 \omega_1 = 1.0 \omega_2 = 1.0$   |                                                      |                                                   |

---

Table S4 List of 16 unique positively selected genes identified in long-lived species none in the Control group.

| Branch                       | Gene         | Model       | LnL        | 2ΔlnL  | p.adjust                                            | Parameters                                           | Positive Sites (pp > 0.8)                                               |
|------------------------------|--------------|-------------|------------|--------|-----------------------------------------------------|------------------------------------------------------|-------------------------------------------------------------------------|
| <i>Heterocephalus glaber</i> | <i>SHC1</i>  | ModelA      | -8468.794  |        |                                                     | $\omega_0 = 0.021 \omega_1 = 1.0 \omega_2 = 23.46$   | 51 0.972*;                                                              |
|                              |              | ModelA Null | -8471.238  | 4.888  | 0.027                                               | $\omega_0 = 0.021 \omega_1 = 1.0 \omega_2 = 1.0$     |                                                                         |
| <i>Homo sapiens</i>          | <i>EMD</i>   | ModelA      | -1585.090  |        |                                                     | $\omega_0 = 0.066 \omega_1 = 1.0 \omega_2 = 325.92$  | 6 0.996**;                                                              |
|                              |              | ModelA Null | -1588.927  | 7.674  | 0.006                                               | $\omega_0 = 0.065 \omega_1 = 1.0 \omega_2 = 1.0$     |                                                                         |
| <i>Pongo abelii</i>          | <i>PPARA</i> | ModelA      | -9645.415  |        |                                                     | $\omega_0 = 0.023 \omega_1 = 1.0 \omega_2 = 8.497$   | 220 0.978*; 222 0.992**; 223 0.838; 291 0.989*;                         |
|                              |              | ModelA Null | -9649.334  | 7.838  | 0.005                                               | $\omega_0 = 0.023 \omega_1 = 1.0 \omega_2 = 1.0$     |                                                                         |
|                              | <i>EGR1</i>  | ModelA      | -8655.636  |        |                                                     | $\omega_0 = 0.032 \omega_1 = 1.0 \omega_2 = 10.739$  | 83 0.994**; 95 0.996**; 313 0.967*; 415 0.562; 417 0.987*;              |
|                              |              | ModelA Null | -8660.138  | 9.005  | 0.003                                               | $\omega_0 = 0.031 \omega_1 = 1.0 \omega_2 = 1.0$     |                                                                         |
| <i>STAT5B</i>                | ModelA       | -11534.536  |            |        | $\omega_0 = 0.015 \omega_1 = 1.0 \omega_2 = 12.221$ | 625 0.962*; 627 0.988*;                              |                                                                         |
|                              | ModelA Null  | -11538.173  | 7.274      | 0.007  | $\omega_0 = 0.015 \omega_1 = 1.0 \omega_2 = 1.0$    |                                                      |                                                                         |
| <i>Microcebus murinus</i>    | <i>HELLS</i> | ModelA      | -12118.730 |        |                                                     | $\omega_0 = 0.046 \omega_1 = 1.0 \omega_2 = 73.435$  | 267 0.956*; 271 0.916;                                                  |
|                              |              | ModelA Null | -12123.525 | 9.590  | 0.002                                               | $\omega_0 = 0.045 \omega_1 = 1.0 \omega_2 = 1.0$     |                                                                         |
| <i>Callithrix jacchus</i>    | <i>NCOR1</i> | ModelA      | -33035.937 |        |                                                     | $\omega_0 = 0.044 \omega_1 = 1.0 \omega_2 = 909.062$ | 1377 0.991**; 1533 0.995**; 1536 M 0.992**; 1547 0.993**; 1548 0.992**; |
|                              |              | ModelA Null | -33055.111 | 38.347 | 0.000                                               | $\omega_0 = 0.043 \omega_1 = 1.0 \omega_2 = 1.0$     |                                                                         |
| <i>Macaca nemestrina</i>     | <i>ERBB2</i> | ModelA      | -22231.960 |        |                                                     | $\omega_0 = 0.04 \omega_1 = 1.0 \omega_2 = 147.608$  | 536 0.984*; 538 0.983*;                                                 |
|                              |              | ModelA Null | -22242.961 | 22.002 | 0.000                                               | $\omega_0 = 0.04 \omega_1 = 1.0 \omega_2 = 1.0$      |                                                                         |
| <i>Choloepus hoffmanni</i>   | <i>VCP</i>   | ModelA      | -11067.049 |        |                                                     | $\omega_0 = 0.001 \omega_1 = 1.0 \omega_2 = 8.211$   | 630 0.975*;                                                             |
|                              |              | ModelA Null | -11069.586 | 5.074  | 0.024                                               | $\omega_0 = 0.001 \omega_1 = 1.0 \omega_2 = 1.0$     |                                                                         |

|                         |              |             |            |       |       |                                                          |                                                          |
|-------------------------|--------------|-------------|------------|-------|-------|----------------------------------------------------------|----------------------------------------------------------|
|                         | <i>FOXO4</i> | ModelA      | -6679.140  |       |       | $\omega_0 = 0.073$ $\omega_1 = 1.0$ $\omega_2 = 37.485$  | 37 0.848; 164 0.849; 169 0.835;<br>227 0.811; 330 0.826; |
|                         |              | ModelA Null | -6681.398  | 4.517 | 0.034 | $\omega_0 = 0.072$ $\omega_1 = 1.0$ $\omega_2 = 1.0$     |                                                          |
|                         | <i>IGF1</i>  | ModelA      | -1755.382  |       |       | $\omega_0 = 0.032$ $\omega_1 = 1.0$ $\omega_2 = 25.79$   | 81 0.995**;                                              |
|                         |              | ModelA Null | -1757.452  | 4.140 | 0.042 | $\omega_0 = 0.031$ $\omega_1 = 1.0$ $\omega_2 = 1.0$     |                                                          |
| <i>Myotis lucifugus</i> | <i>CTGF</i>  | ModelA      | -4684.116  |       |       | $\omega_0 = 0.028$ $\omega_1 = 1.0$ $\omega_2 = 52.795$  | 253 0.987*;                                              |
|                         |              | ModelA Null | -4686.771  | 5.310 | 0.021 | $\omega_0 = 0.028$ $\omega_1 = 1.0$ $\omega_2 = 1.0$     |                                                          |
|                         | <i>BCL2</i>  | ModelA      | -2485.926  |       |       | $\omega_0 = 0.03$ $\omega_1 = 1.0$ $\omega_2 = 999.0$    | 60 0.990*;                                               |
|                         |              | ModelA Null | -2489.412  | 6.971 | 0.008 | $\omega_0 = 0.028$ $\omega_1 = 1.0$ $\omega_2 = 1.0$     |                                                          |
|                         | <i>GHRH</i>  | ModelA      | -1064.223  |       |       | $\omega_0 = 0.112$ $\omega_1 = 1.0$ $\omega_2 = 25.548$  | 30 0.960*;; 37 0.865;                                    |
|                         |              | ModelA Null | -1066.620  | 4.793 | 0.029 | $\omega_0 = 0.111$ $\omega_1 = 1.0$ $\omega_2 = 1.0$     |                                                          |
|                         | <i>ERCC3</i> | ModelA      | -12103.038 |       |       | $\omega_0 = 0.011$ $\omega_1 = 1.0$ $\omega_2 = 6.5$     | 623 0.978*;; 626 0.959*;                                 |
|                         |              | ModelA Null | -12105.404 | 4.731 | 0.030 | $\omega_0 = 0.011$ $\omega_1 = 1.0$ $\omega_2 = 1.0$     |                                                          |
|                         | <i>DBNI</i>  | ModelA      | -6652.028  |       |       | $\omega_0 = 0.023$ $\omega_1 = 1.0$ $\omega_2 = 998.998$ | 244 0.991**;                                             |
|                         |              | ModelA Null | -6655.057  | 6.058 | 0.014 | $\omega_0 = 0.022$ $\omega_1 = 1.0$ $\omega_2 = 1.0$     |                                                          |
| <i>Myotis brandtii</i>  | <i>CTGF</i>  | ModelA      | -4627.497  |       |       | $\omega_0 = 0.029$ $\omega_1 = 1.0$ $\omega_2 = 23.054$  | 248 0.986*;                                              |
|                         |              | ModelA Null | -4629.796  | 4.598 | 0.032 | $\omega_0 = 0.029$ $\omega_1 = 1.0$ $\omega_2 = 1.0$     |                                                          |
|                         | <i>DBNI</i>  | ModelA      | -6674.313  |       |       | $\omega_0 = 0.02$ $\omega_1 = 1.0$ $\omega_2 = 998.999$  | 247 0.991**;; 251 0.569;                                 |
|                         |              | ModelA Null | -6676.998  | 5.370 | 0.020 | $\omega_0 = 0.02$ $\omega_1 = 1.0$ $\omega_2 = 1.0$      |                                                          |

Table S5 List of positively selected genes identified in the Control group (lifespan with non-increased).

| Branch                       | Gene          | ModelA<br>LnL | ModelA<br>Null LnL | 2ΔLnL  | P.adj | ω       | Positive Sites ( pp > 0.8)                                        |
|------------------------------|---------------|---------------|--------------------|--------|-------|---------|-------------------------------------------------------------------|
| <i>Monodelphis domestica</i> | <i>CIQA</i>   | -5538.881     | -5545.187          | 12.610 | 0.000 | 999.000 | 73 0.867;                                                         |
|                              | <i>CDKN2B</i> | -1863.771     | -1865.890          | 4.237  | 0.040 | 999.000 |                                                                   |
|                              | <i>E2F1</i>   | -2392.934     | -2395.489          | 5.111  | 0.024 | 172.285 | 13 0.958*; 120 0.996**;                                           |
|                              | <i>EPOR</i>   | -6314.556     | -6317.221          | 5.331  | 0.021 | 999.000 |                                                                   |
|                              | <i>GRN</i>    | -10086.825    | -10089.485         | 5.320  | 0.021 | 6.174   | 82 0.997**; 218 0.937; 237 0.921; 361 0.928;                      |
|                              | <i>PDGFRB</i> | -19240.541    | -19242.569         | 4.055  | 0.044 | 999.000 |                                                                   |
|                              | <i>TCF3</i>   | -5075.225     | -5079.541          | 8.633  | 0.003 | 999.000 | 37 0.900;                                                         |
|                              | <i>WRN</i>    | -20595.302    | -20597.668         | 4.732  | 0.030 | 3.803   | 122 0.815; 140 0.916; 179 0.880; 221 0.944; 754 0.930; 830 0.800; |
| <i>Erinaceus europaeus</i>   | <i>ATP5O</i>  | -5154.135     | -5158.448          | 8.626  | 0.003 | 998.999 | 108 0.955*;                                                       |
|                              | <i>EGFR</i>   | -19923.857    | -19927.105         | 6.498  | 0.011 | 222.335 | 108 0.879; 362 0.992**;                                           |
|                              | <i>ERCC2</i>  | -9250.400     | -9252.840          | 4.881  | 0.027 | 76.206  | 115 0.971*;                                                       |
|                              | <i>IL7R</i>   | -5444.146     | -5448.084          | 7.878  | 0.005 | 998.996 | 130 0.959*;                                                       |
|                              | <i>IRS1</i>   | -17165.290    | -17168.343         | 6.106  | 0.013 | 71.541  | 813 0.980*;                                                       |
|                              | <i>PLCG2</i>  | -19713.551    | -19716.032         | 4.962  | 0.026 | 193.319 | 529 0.848; 973 0.958*;                                            |
|                              | <i>PRKCD</i>  | -10447.433    | -10449.841         | 4.814  | 0.028 | 289.954 | 126 0.956*;                                                       |
|                              | <i>WRN</i>    | -20593.655    | -20597.108         | 6.905  | 0.009 | 48.257  | 46 0.977*;                                                        |
| <i>Sorex araneus</i>         | <i>ATM</i>    | -46023.593    | -46025.930         | 4.675  | 0.031 | 71.039  | 1292 0.918;                                                       |
|                              | <i>CSNK1E</i> | -3547.007     | -3550.472          | 6.929  | 0.008 | 131.183 | 196 S 0.999**;                                                    |
|                              | <i>DGATI</i>  | -7318.911     | -7321.407          | 4.992  | 0.025 | 10.190  | 144 0.974*; 155 0.979*;                                           |
|                              | <i>EGFR</i>   | -19918.687    | -19921.351         | 5.328  | 0.021 | 6.760   | 51 0.815; 61 0.969*; 273 0.979*; 311 0.974*;                      |



|                                    |               |            |            |        |       |         |                                                                                         |
|------------------------------------|---------------|------------|------------|--------|-------|---------|-----------------------------------------------------------------------------------------|
| <i>Vicugna pacos</i>               | <i>ATM</i>    | -46018.456 | -46025.051 | 13.190 | 0.000 | 999.000 |                                                                                         |
|                                    | <i>POU1F1</i> | -4055.775  | -4058.869  | 6.188  | 0.013 | 56.107  | 109 0.940; 110 0.995**;                                                                 |
|                                    | <i>WRN</i>    | -20594.354 | -20596.545 | 4.382  | 0.036 | 12.190  | 41 0.832;                                                                               |
| <i>Balaenoptera acutorostrata</i>  | <i>CREBBP</i> | -31777.346 | -31780.419 | 6.147  | 0.013 | 999.000 |                                                                                         |
|                                    | <i>TP53</i>   | -6740.036  | -6742.380  | 4.687  | 0.030 | 803.289 | 16 0.934; 256 0.774;                                                                    |
| <i>Physeter catodon</i>            | <i>PEX5</i>   | -10500.399 | -10502.424 | 4.051  | 0.044 | 34.021  | 176 0.979*;                                                                             |
|                                    | <i>RET</i>    | -18990.461 | -18993.624 | 6.326  | 0.012 | 999.000 |                                                                                         |
|                                    | <i>WRN</i>    | -20587.788 | -20593.753 | 11.930 | 0.001 | 57.266  | 28 0.932; 103 0.936; 104 0.954*; 123 0.931; 313 0.932; 361 0.849; 391 0.937; 727 0.937; |
| <i>Lipotes vexillifer</i>          | <i>CTNNB1</i> | -11720.807 | -11728.532 | 15.450 | 0.000 | 41.950  | 232 0.998**; 237 0.998**; 241 0.998**;                                                  |
| <i>Neophocaena asiaeorientalis</i> | <i>EGFR</i>   | -19922.900 | -19925.149 | 4.499  | 0.034 | 51.671  | 449 0.974*;                                                                             |
|                                    | <i>HBP1</i>   | -7063.837  | -7067.297  | 6.919  | 0.009 | 999.000 |                                                                                         |
|                                    | <i>PLCG2</i>  | -19713.812 | -19717.161 | 6.698  | 0.010 | 100.437 | 349 0.863;                                                                              |
| <i>Tursiops truncatus</i>          | <i>ATF2</i>   | -6389.079  | -6398.543  | 18.928 | 0.000 | 999.000 | 229 0.864; 230 0.861; 231 0.985*; 233 0.862;                                            |
|                                    | <i>RPA1</i>   | -7529.648  | -7533.595  | 7.895  | 0.005 | 47.310  | 18 0.843; 20 0.947; 103 0.949; 165 0.937; 351 0.850;                                    |
| <i>Bos taurus</i>                  | <i>ATF2</i>   | -6397.059  | -6403.995  | 13.872 | 0.000 | 999.000 | 291 0.989*;                                                                             |
|                                    | <i>PLCG2</i>  | -19707.070 | -19711.233 | 8.326  | 0.004 | 215.766 | 671 0.999**;                                                                            |
|                                    | <i>STAT5A</i> | -11169.276 | -11173.284 | 8.017  | 0.005 | 999.000 | 564 0.839; 567 0.979*;                                                                  |
|                                    | <i>TP53</i>   | -6737.635  | -6739.930  | 4.591  | 0.032 | 17.863  | 217 0.803; 234 0.994**;                                                                 |
| <i>Ovis aries</i>                  | <i>BLM</i>    | -16541.616 | -16543.674 | 4.115  | 0.042 | 19.666  | 310 0.959*;                                                                             |
|                                    | <i>CIQA</i>   | -5546.774  | -5549.762  | 5.974  | 0.015 | 39.244  | 167 0.996**;                                                                            |
|                                    | <i>EFEMP1</i> | -5816.921  | -5823.437  | 13.034 | 0.000 | 999.000 | 91 0.987*;                                                                              |
|                                    | <i>ERCC1</i>  | -3386.015  | -3390.291  | 8.551  | 0.003 | 999.000 | 32 0.995**;                                                                             |
|                                    | <i>ERCC6</i>  | -17723.956 | -17726.237 | 4.563  | 0.033 | 27.178  | 524 0.805; 729 0.981*;                                                                  |



|                              |               |            |            |        |       |         |                                                                            |
|------------------------------|---------------|------------|------------|--------|-------|---------|----------------------------------------------------------------------------|
|                              | <i>FGFR1</i>  | -11324.135 | -11331.225 | 14.181 | 0.000 | 561.209 | 29 0.984*;<br>216 0.833; 258 0.989*; 261 0.881; 265 1.000**;               |
|                              | <i>LMNA</i>   | -9755.026  | -9775.625  | 41.199 | 0.000 | 200.920 | 266 0.996**; 268 1.000**; 271 0.989*; 273 0.999**;                         |
|                              | <i>STAT5A</i> | -11160.425 | -11165.223 | 9.596  | 0.002 | 31.393  | 287 0.997**; 530 0.997**;                                                  |
| <i>Pteropus vampyrus</i>     | <i>ERCC5</i>  | -10725.028 | -10728.066 | 6.076  | 0.014 | 999.000 | 102 0.952*;                                                                |
|                              | <i>GTF2H2</i> | -6238.838  | -6242.162  | 6.649  | 0.010 | 34.116  | 331 0.998**;                                                               |
|                              | <i>PLAU</i>   | -8042.448  | -8045.076  | 5.255  | 0.022 | 19.959  | 111 0.986*;                                                                |
|                              | <i>TP53</i>   | -6738.410  | -6740.684  | 4.549  | 0.033 | 9.279   | 3 0.967*; 236 0.980*;                                                      |
| <i>Oryctolagus cuniculus</i> | <i>APOE</i>   | -3955.420  | -3959.370  | 7.899  | 0.005 | 998.999 | 30 0.995**;                                                                |
|                              | <i>APP</i>    | -11007.255 | -11009.516 | 4.523  | 0.033 | 857.138 | 64 0.822;                                                                  |
|                              | <i>ERCC1</i>  | -3382.099  | -3384.199  | 4.199  | 0.040 | 8.279   | 32 0.997**; 33 0.997**;                                                    |
| <i>Ochotona princeps</i>     | <i>BRCA1</i>  | -6668.587  | -6670.550  | 3.927  | 0.048 | 19.169  | 205 0.932;                                                                 |
|                              | <i>FGFR1</i>  | -11291.278 | -11299.194 | 15.833 | 0.000 | 22.174  | 106 0.949; 293 0.996**; 313 0.959*; 315 0.995**; 317 0.996**; 322 1.000**; |
|                              | <i>PTPN11</i> | -7799.861  | -7802.652  | 5.582  | 0.018 | 8.277   | 36 0.976*; 37 0.956*;                                                      |
|                              | <i>TCF3</i>   | -5077.244  | -5079.570  | 4.651  | 0.031 | 42.495  | 22 0.930; 30 0.854; 135 0.975*; 151 0.980*;                                |
| <i>Cavia porcellus</i>       | <i>ABL1</i>   | -14934.278 | -14936.725 | 4.893  | 0.027 | 14.298  | 594 0.974*;                                                                |
|                              | <i>BRCA1</i>  | -6668.680  | -6670.745  | 4.131  | 0.042 | 124.250 | 90 0.917;                                                                  |
|                              | <i>CLOCK</i>  | -10373.627 | -10377.753 | 8.252  | 0.004 | 33.836  | 540 0.978*; 542 0.960*;                                                    |
|                              | <i>COQ7</i>   | -4030.303  | -4033.199  | 5.793  | 0.016 | 15.511  | 30 0.995**; 132 0.931;                                                     |
|                              | <i>GSK3B</i>  | -4550.408  | -4562.021  | 23.227 | 0.000 | 396.636 | 269 0.999**; 270 0.995**;                                                  |
|                              | <i>IL7R</i>   | -5446.285  | -5448.529  | 4.488  | 0.034 | 50.989  | 22 0.912; 145 0.883;                                                       |
|                              | <i>PTEN</i>   | -3919.257  | -3921.259  | 4.004  | 0.045 | 999.000 | 211 0.947;                                                                 |
| <i>Rattus norvegicus</i>     | <i>APTX</i>   | -4872.003  | -4874.539  | 5.072  | 0.024 | 142.605 | 63 0.949;                                                                  |

|                             |               |            |            |        |       |         |                                           |
|-----------------------------|---------------|------------|------------|--------|-------|---------|-------------------------------------------|
| <i>Mus musculus</i>         | <i>TP53</i>   | -6739.875  | -6742.120  | 4.491  | 0.034 | 29.162  | 65 0.984*;                                |
|                             | <i>CDK1</i>   | -4086.492  | -4088.416  | 3.847  | 0.050 | 20.118  | 25 0.987*;                                |
|                             | <i>ERCC5</i>  | -10720.589 | -10724.764 | 8.351  | 0.004 | 998.999 | 439 0.940; 440 0.972*;                    |
|                             | <i>PLCG2</i>  | -19713.235 | -19716.547 | 6.623  | 0.010 | 29.784  | 446 0.951*;                               |
|                             | <i>PTPN1</i>  | -3967.679  | -3970.183  | 5.007  | 0.025 | 16.519  | 54 0.992**;                               |
| <i>Carlito syrichta</i>     | <i>APP</i>    | -11004.452 | -11006.442 | 3.979  | 0.046 | 17.595  | 29 0.971*;                                |
|                             | <i>ATM</i>    | -46020.707 | -46022.678 | 3.942  | 0.047 | 6.273   | 947 0.863;                                |
|                             | <i>ATR</i>    | -37799.307 | -37801.665 | 4.716  | 0.030 | 26.025  | 1415 0.852; 1445 0.878; 2092 0.963*;      |
|                             | <i>BRCA1</i>  | -6666.566  | -6669.328  | 5.524  | 0.019 | 20.846  | 46 0.922; 156 0.891; 190 0.870;           |
|                             | <i>CDKN1A</i> | -2402.539  | -2405.375  | 5.672  | 0.017 | 998.997 |                                           |
|                             | <i>ERCC6</i>  | -17722.824 | -17725.639 | 5.629  | 0.018 | 214.303 | 337 0.982*;                               |
|                             | <i>PLCG2</i>  | -19712.406 | -19714.546 | 4.282  | 0.039 | 63.187  | 279 0.947; 404 0.960*;                    |
| <i>Dasypus novemcinctus</i> | <i>FGFR1</i>  | -11325.901 | -11331.003 | 10.204 | 0.001 | 720.678 | 25 0.982*;                                |
|                             | <i>PDGFB</i>  | -2522.677  | -2526.832  | 8.311  | 0.004 | 25.259  | 91 0.995**; 95 0.996**; 100 0.996**;      |
|                             | <i>PDGFRB</i> | -19249.314 | -19251.419 | 4.211  | 0.040 | 12.923  | 234 0.952*; 324 0.978*; 342 0.978*;       |
|                             | <i>RET</i>    | -18991.404 | -18993.583 | 4.357  | 0.037 | 513.465 | 15 0.959*;                                |
|                             | <i>TP53</i>   | -6739.030  | -6742.070  | 6.079  | 0.014 | 9.568   | 39 0.884; 45 0.831; 158 0.870; 212 0.907; |
|                             | <i>TXN</i>    | -1842.886  | -1846.297  | 6.822  | 0.009 | 998.999 | 37 0.998**;                               |
| <i>Procapia capensis</i>    | <i>CCNA2</i>  | -5425.443  | -5430.899  | 10.912 | 0.001 | 999.000 | 77 0.806; 309 0.994**;                    |
|                             | <i>ERCC8</i>  | -3368.939  | -3373.330  | 8.782  | 0.003 | 999.000 | 207 0.996**;                              |
|                             | <i>GRN</i>    | -10091.036 | -10094.985 | 7.899  | 0.005 | 30.580  | 238 0.993**;                              |
|                             | <i>GSS</i>    | -7142.769  | -7149.881  | 14.223 | 0.000 | 18.826  | 64 0.993**; 180 0.999**;                  |
|                             | <i>HRAS</i>   | -3292.198  | -3295.910  | 7.423  | 0.006 | 516.135 | 98 0.993**;                               |
|                             | <i>IL7R</i>   | -5446.572  | -5448.580  | 4.016  | 0.045 | 247.285 | 16 0.933;                                 |
|                             | <i>NGF</i>    | -4530.766  | -4534.491  | 7.452  | 0.006 | 56.211  | 20 0.969*;                                |

|                           |               |            |            |        |       |         |                                                 |
|---------------------------|---------------|------------|------------|--------|-------|---------|-------------------------------------------------|
| <i>Loxodonta africana</i> | <i>H2AFX</i>  | -2275.081  | -2277.260  | 4.359  | 0.037 | 152.949 | 7 0.983*; 100 0.916;                            |
|                           | <i>HDAC3</i>  | -5300.482  | -5303.360  | 5.756  | 0.016 | 15.752  | 189 0.995**; 191 0.935;                         |
|                           | <i>INSR</i>   | -23208.190 | -23219.297 | 22.214 | 0.000 | 999.000 | 751 0.986*; 752 0.981*; 753 0.983*; 1038 0.906; |
| <i>Echinops telfairi</i>  | <i>ATR</i>    | -37801.729 | -37803.898 | 4.337  | 0.037 | 461.674 | 1310 0.964*;                                    |
|                           | <i>BSCL2</i>  | -5499.130  | -5502.035  | 5.810  | 0.016 | 324.696 | 256 0.971*;                                     |
|                           | <i>GHR</i>    | -9029.318  | -9031.404  | 4.171  | 0.041 | 29.614  | 71 0.881;                                       |
|                           | <i>HESX1</i>  | -2747.147  | -2750.473  | 6.651  | 0.010 | 72.536  | 35 0.991**;                                     |
|                           | <i>LMNA</i>   | -9809.656  | -9802.213  | 14.887 | 0.000 | 1.949   |                                                 |
|                           | <i>PDGFRB</i> | -19251.301 | -19253.511 | 4.422  | 0.035 | 998.998 | 64 0.961*; 271 0.978*;                          |

Table S6. Lambda ( $\lambda$ ) parameter estimates for life-history traits in mammals

| <b>Life-History Trait</b> | <b><math>\lambda</math></b> | <b><math>P(\lambda)^a</math></b> |
|---------------------------|-----------------------------|----------------------------------|
| MLS                       | 0.97                        | <0.001                           |
| BM                        | 0.99                        | <0.001                           |
| LQ                        | 0.97                        | 0.004                            |

<sup>a</sup> Significance of difference of the  $\lambda$  model.

Table S7. Summary of genes with a root-to-tip  $d_N/d_S$  significantly correlated with maximum lifespan (MLS), body mass (BM), longevity quotient (LQ).

| formula      | model | outlier sample       | R <sup>2</sup> | lambda | coefficient | p value | p value.robust | R <sup>2</sup> .robust | p value.max |
|--------------|-------|----------------------|----------------|--------|-------------|---------|----------------|------------------------|-------------|
| BM ~ BMI1    | pgls  | "Balaena_mysticetus" | 0.2845         | 0.94   | 4.0224      | 0.0006  | 0.0004         | 0.311                  | 0.0157      |
| BM ~ CTNNB1  | pgls  | "Myotis_brandtii"    | 0.2076         | 1      | 5.1071      | 0.0035  | 0.0035         | 0.2126                 | 0.0216      |
| BM ~ E2F1    | pgls  | "Orcinus_orca"       | 0.1146         | 0.961  | 3.2092      | 0.0246  | 0.0066         | 0.1792                 | 0.0203      |
| BM ~ ERBB2   | pgls  | "Physeter_catodon"   | 0.1539         | 1      | 6.6927      | 0.0104  | 0.0043         | 0.1985                 | 0.034       |
| BM ~ IGF1    | pgls  | "Balaena_mysticetus" | 0.227          | 0.983  | -3.1432     | 0.0034  | 0.0045         | 0.2204                 | 0.016       |
| BM ~ IGF1R   | pgls  | "Loxodonta_african"  | 0.3368         | 0.849  | -4.8164     | 0.0001  | 0.0001         | 0.3558                 | 0.0003      |
| BM ~ PDGFB   | pgls  | "Myotis_brandtii"    | 0.1799         | 0.931  | 7.015       | 0.0065  | 0.0028         | 0.2226                 | 0.0091      |
| LQ ~ CDK1    | pgls  | "Myotis_brandtii"    | 0.337          | 0.439  | 1.7315      | 0.0045  | 0.002          | 0.2435                 | 0.0075      |
| LQ ~ ERCC3   | ols   | "Myotis_brandtii"    | 0.1541         | 0      | 1.8044      | 0.0103  | 0.0024         | 0.2236                 | 0.0085      |
| LQ ~ HRAS    | pgls  | "Homo_sapiens"       | 0.2071         | 0.735  | 0.6264      | 0.0035  | 0.0005         | 0.2959                 | 0.0045      |
| LQ ~ INSR    | ols   | "Homo_sapiens"       | 0.2197         | 0      | 3.574       | 0.0023  | 0.0003         | 0.3103                 | 0.0035      |
| MLS ~ ARNTL  | pgls  | "Sorex_araneus"      | 0.1233         | 0.886  | 0.9055      | 0.022   | 0.0044         | 0.2029                 | 0.0202      |
| MLS ~ ATM    | pgls  | "Balaena_mysticetus" | 0.1834         | 0.894  | 3.7153      | 0.0053  | 0.0025         | 0.2216                 | 0.0517      |
| MLS ~ BMI1   | pgls  | "Rattus_norvegicus"  | 0.2084         | 0.855  | 0.7916      | 0.0034  | 0.0008         | 0.2756                 | 0.0034      |
| MLS ~ CDK1   | ols   | "Mus_musculus"       | 0.369          | 0      | 0.7481      | 0.0001  | 0.0001         | 0.4139                 | 0.0003      |
| MLS ~ CTNNB1 | pgls  | "Sorex_araneus"      | 0.143          | 1      | 1.0173      | 0.0144  | 0.0014         | 0.2537                 | 0.0079      |
| MLS ~ ERCC3  | pgls  | "Equus_caballus"     | 0.1007         | 0.753  | 0.5619      | 0.0333  | 0              | 0.4039                 | 0.001       |
| MLS ~ ERCC5  | pgls  | "Balaena_mysticetus" | 0.1829         | 0.673  | 1.6322      | 0.0054  | 0.0058         | 0.1851                 | 0.088       |
| MLS ~ NRG1   | pgls  | "Balaena_mysticetus" | 0.1874         | 0.997  | 0.6153      | 0.0049  | 0.0018         | 0.2356                 | 0.0589      |
| MLS ~ STAT5A | ols   | "Homo_sapiens"       | 0.4206         | 0      | 1.4094      | 0       | 0              | 0.4723                 | 0           |

## REFERENCES

1. Austad, S. (2010). Methusaleh's Zoo: how nature provides us with clues for extending human health span. *J. Comp. Pathol.* **142**, S10-S21.
2. De Magalhães, J.P., Costa, J., and Church, G.M. (2007). An analysis of the relationship between metabolism, developmental schedules, and longevity using phylogenetic independent contrasts. *J. Gerontol. A Biol. Sci. Med. Sci.* **62**, 149-160.
3. Tacutu, R., Thornton, D., Johnson, E., et al. (2018). Human Aging Genomic Resources: new and updated databases. *Nucleic Acids Res.* **46**, D1083-D1090.
4. Scornavacca, C., Belkhir, K., Lopez, J., et al. (2019). OrthoMaM v10: scaling-up orthologous coding sequence and exon alignments with more than one hundred mammalian genomes. *Mol. Biol. Evol.* **36**, 861-862.
5. Keane, M., Semeiks, J., Webb, A.E., et al. (2015). Insights into the evolution of longevity from the bowhead whale genome. *Cell Rep.* **10**, 112-122.
6. Castresana, J. (2000). Selection of conserved blocks from multiple alignments for their use in phylogenetic analysis. *Mol. Biol. Evol.* **17**, 540-552.
7. Fletcher, W., and Yang, Z. (2010). The effect of insertions, deletions, and alignment errors on the branch-site test of positive selection. *Mol. Biol. Evol.* **27**, 2257-2267.
8. Talavera, G., and Castresana, J. (2007). Improvement of phylogenies after removing divergent and ambiguously aligned blocks from protein sequence alignments. *Syst. Biol.* **56**, 564-577.
9. Yang, Z. (2007). PAML 4: phylogenetic analysis by maximum likelihood. *Mol. Biol. Evol.* **24**, 1586-1591.
10. Kumar, S., Stecher, G., Suleski, M., et al. (2017). TimeTree: a resource for timelines, timetrees, and divergence times. *Mol. Biol. Evol.* **34**, 1812-1819.
11. Zhang, J., Nielsen, R., and Yang, Z. (2005). Evaluation of an improved branch-site likelihood method for detecting positive selection at the molecular level. *Mol. Biol. Evol.* **22**, 2472-2479.
12. Yang, Z., Wong, W.S., and Nielsen, R. (2005). Bayes empirical Bayes inference of amino acid sites under positive selection. *Mol. Biol. Evol.* **22**, 1107-1118.
13. Weadick, C.J., and Chang, B.S. (2011). An improved likelihood ratio test for detecting site-specific functional divergence among clades of protein-coding genes. *Mol. Biol. Evol.* **29**, 1297-1300.
14. Anisimova, M., and Yang, Z. (2007). Multiple hypothesis testing to detect lineages under positive selection that affects only a few sites. *Mol. Biol. Evol.* **24**, 1219-1228.
15. Zhang, J., and Kumar, S. (1997). Detection of convergent and parallel evolution at the amino acid sequence level. *Mol. Biol. Evol.* **14**, 527-536.
16. Zou, Z., and Zhang, J. (2015). Are convergent and parallel amino acid substitutions in protein evolution more prevalent than neutral expectations? *Mol. Biol. Evol.* **32**, 2085-2096.
17. Sun, Y.-B. (2018). FasParser2: a graphical platform for batch manipulation of tremendous amount of sequence data. *Bioinformatics* **34**, 2493-2495.
18. Natarajan, C., Projecto-Garcia, J., Moriyama, H., et al. (2015). Convergent evolution of hemoglobin function in high-altitude Andean waterfowl involves limited parallelism at the molecular sequence level. *PLoS Genet.* **11**, e1005681.
19. Muntané, G., Farré, X., Rodríguez, J.A., et al. (2018). Biological processes modulating longevity across primates: a phylogenetic genome-phenome analysis. *Mol. Biol. Evol.* **35**, 1990-2004.
20. Revell, L.J. (2012). phytools: an R package for phylogenetic comparative biology (and other things). *Methods Ecol. Evol.* **3**, 217-223.

21. Orme, D., Freckleton, R., Thomas, G., and Petzoldt, T. (2013). The caper package: comparative analysis of phylogenetics and evolution in R. R package version 5, 1-36.
22. Montgomery, S., and Mundy, N. (2013). Microcephaly genes and the evolution of sexual dimorphism in primate brain size. *J. Evol. Biol.* **26**, 906-911.
23. Ma, S., Yim, S.H., Lee, S.-G., et al. (2015). Organization of the mammalian metabolome according to organ function, lineage specialization, and longevity. *Cell Metab.* **22**, 332-343.
24. Yu, G., Wang, L.-G., Han, Y., and He, Q.-Y. (2012). clusterProfiler: an R package for comparing biological themes among gene clusters. *OMICS* **16**, 284-287.
25. Thissen, D., Steinberg, L., and Kuang, D. (2002). Quick and easy implementation of the Benjamini-Hochberg procedure for controlling the false positive rate in multiple comparisons. *J. Educ. Behav. Stat.* **27**, 77-83.
26. Szklarczyk, D., Gable, A.L., Lyon, D., et al. (2019). STRING v11: protein–protein association networks with increased coverage, supporting functional discovery in genome-wide experimental datasets. *Nucleic Acids Res.* **47**, D607-D613.
